# Supplementary material for: Contrasting drivers of reproductive ageing in albatrosses
Source: PubMed Central journal article supplement (PMC5601251; doi:10.1111/1365-2656.12712), 2017-07-17
Supplement: JANE-86-1022-s001.pdf [file JANE-86-1022-s001.pdf]

## Supplementary material 2: Supplementary tables

Table S1. Models describing the relationship between age and breeding success in three species of albatrosses breeding at Bird Island, South Georgia. Tables show null models (ID: random intercept for individual; Year + ID: random intercepts for year and individual; Age: fixed linear covariate for age plus random intercepts for year and individual), and the top model set (where  $\Delta AIC < 2$  compared to the model with the lowest AIC score, see Methods), ordered by AIC. Numbers shown in the Model column indicate the threshold values fitted.

| Black-browed albatross |         |              |                  |         |              |         |         |              |
|------------------------|---------|--------------|------------------|---------|--------------|---------|---------|--------------|
| Males                  |         |              | Females          |         |              |         |         |              |
| Model                  | AIC     | $\Delta AIC$ | Model            | AIC     | $\Delta AIC$ | Model   | AIC     | $\Delta AIC$ |
| 18                     | 2760.04 | 0.00         | 23               | 1850.44 | 0.00         | 24 26   | 1852.28 | 1.84         |
| 15 18                  | 2760.40 | 0.37         | 22               | 1850.63 | 0.19         | 23 26   | 1852.30 | 1.86         |
| 19                     | 2760.53 | 0.50         | 21               | 1851.01 | 0.57         | 21 28   | 1852.31 | 1.88         |
| 20                     | 2760.91 | 0.87         | Age <sup>2</sup> | 1851.05 | 0.61         | 20 29   | 1852.32 | 1.88         |
| 14 18                  | 2760.95 | 0.92         | 24               | 1851.08 | 0.64         | 21 25   | 1852.35 | 1.91         |
| 16 18                  | 2760.97 | 0.93         | 20               | 1851.27 | 0.84         | 20 26   | 1852.35 | 1.91         |
| 13 18                  | 2761.50 | 1.47         | 20 24            | 1851.81 | 1.37         | 20 27   | 1852.37 | 1.93         |
| 18 25                  | 2761.59 | 1.55         | 13 23            | 1851.82 | 1.39         | 25      | 1852.37 | 1.94         |
| 12 18                  | 2761.73 | 1.69         | 15 23            | 1851.84 | 1.40         | 23 27   | 1852.38 | 1.94         |
| 18 26                  | 2761.77 | 1.73         | 19 24            | 1851.84 | 1.40         | 22 28   | 1852.38 | 1.95         |
| 18 24                  | 2761.78 | 1.74         | 14 23            | 1851.87 | 1.43         | 23 25   | 1852.41 | 1.97         |
| 18 27                  | 2761.84 | 1.80         | 18 23            | 1851.87 | 1.43         | 22 24   | 1852.42 | 1.98         |
| 17                     | 2761.86 | 1.82         | 18 24            | 1851.89 | 1.45         | 23 28   | 1852.42 | 1.99         |
| 18 23                  | 2761.86 | 1.82         | 19 23            | 1851.89 | 1.45         | 23 32   | 1852.43 | 2.00         |
| 18 28                  | 2761.93 | 1.89         | 20 23            | 1851.90 | 1.47         | 23 29   | 1852.44 | 2.00         |
| 18 21                  | 2761.94 | 1.90         | 17 23            | 1851.92 | 1.48         | 23 30   | 1852.44 | 2.00         |
| 18 20                  | 2761.95 | 1.92         | 20 25            | 1851.94 | 1.50         | 23 31   | 1852.44 | 2.00         |
| 18 29                  | 2761.98 | 1.94         | 20 28            | 1852.01 | 1.57         | Age     | 1867.80 | 17.36        |
| 21                     | 2761.98 | 1.94         | 16 23            | 1852.01 | 1.57         | Year+ID | 1870.61 | 20.17        |
| 18 30                  | 2761.99 | 1.95         | 17 24            | 1852.02 | 1.59         | ID      | 1962.35 | 111.91       |
| 18 22                  | 2762.01 | 1.97         | 15 24            | 1852.06 | 1.63         |         |         |              |
| 18 31                  | 2762.03 | 1.99         | 19 25            | 1852.09 | 1.65         |         |         |              |
| 18 33                  | 2762.04 | 2.00         | 14 24            | 1852.18 | 1.74         |         |         |              |
| 11 18                  | 2762.04 | 2.00         | 13 24            | 1852.19 | 1.75         |         |         |              |
| 18 32                  | 2762.04 | 2.00         | 16 24            | 1852.22 | 1.78         |         |         |              |
| Age                    | 2777.98 | 17.94        | 21 24            | 1852.23 | 1.79         |         |         |              |
| Year+ID                | 2793.31 | 33.27        | 21 23            | 1852.24 | 1.81         |         |         |              |
| ID                     | 2993.22 | 233.18       | 18 25            | 1852.26 | 1.82         |         |         |              |

Grey-headed albatross

| Males   |         |              | Females |         |              |         |         |              |
|---------|---------|--------------|---------|---------|--------------|---------|---------|--------------|
| Model   | AIC     | $\Delta$ AIC | Model   | AIC     | $\Delta$ AIC | Model   | AIC     | $\Delta$ AIC |
| 24 27   | 2718.56 | 0.00         | 26      | 2680.61 | 0.00         | 26 33   | 2682.50 | 1.89         |
| 22      | 2718.78 | 0.23         | 25      | 2680.64 | 0.03         | 26 29   | 2682.51 | 1.90         |
| 23 27   | 2718.93 | 0.37         | 26 43   | 2680.66 | 0.05         | 26 28   | 2682.51 | 1.90         |
| 24 26   | 2719.14 | 0.58         | 27      | 2680.74 | 0.13         | 26 30   | 2682.53 | 1.92         |
| 23      | 2719.39 | 0.84         | 21 27   | 2680.83 | 0.22         | 24 30   | 2682.53 | 1.92         |
| 21      | 2719.46 | 0.90         | 28 43   | 2680.94 | 0.33         | 20 29   | 2682.55 | 1.94         |
| 23 32   | 2719.47 | 0.92         | 21 28   | 2681.05 | 0.44         | 26 32   | 2682.56 | 1.95         |
| 22 32   | 2719.51 | 0.96         | 22 27   | 2681.21 | 0.60         | 23 34   | 2682.57 | 1.96         |
| 22 33   | 2719.53 | 0.98         | 25 43   | 2681.26 | 0.65         | 26 37   | 2682.57 | 1.96         |
| 23 33   | 2719.55 | 0.99         | 20 27   | 2681.40 | 0.79         | 26 41   | 2682.58 | 1.97         |
| 22 27   | 2719.56 | 1.01         | 22 28   | 2681.40 | 0.79         | 26 31   | 2682.59 | 1.98         |
| 23 26   | 2719.57 | 1.01         | 21 29   | 2681.44 | 0.83         | 26 40   | 2682.60 | 1.99         |
| 22 41   | 2719.73 | 1.18         | 23 27   | 2681.49 | 0.88         | 26 39   | 2682.60 | 1.99         |
| 22 34   | 2719.80 | 1.24         | 23 28   | 2681.62 | 1.01         | 26 38   | 2682.60 | 1.99         |
| 22 31   | 2719.87 | 1.31         | 22 29   | 2681.71 | 1.10         | Year+ID | 2740.59 | 59.98        |
| 22 40   | 2719.87 | 1.32         | 23 29   | 2681.83 | 1.21         | Age     | 2741.50 | 60.88        |
| 22 42   | 2719.89 | 1.33         | 20 28   | 2681.88 | 1.26         | ID      | 2996.82 | 316.21       |
| 23 31   | 2719.90 | 1.34         | 25 34   | 2681.94 | 1.33         |         |         |              |
| 23 28   | 2719.91 | 1.35         | 24 27   | 2681.98 | 1.37         |         |         |              |
| 23 34   | 2719.93 | 1.38         | 26 42   | 2681.99 | 1.37         |         |         |              |
| 23 29   | 2719.95 | 1.39         | 25 27   | 2681.99 | 1.38         |         |         |              |
| 22 29   | 2720.01 | 1.45         | 25 35   | 2682.00 | 1.39         |         |         |              |
| 23 41   | 2720.01 | 1.45         | 25 28   | 2682.01 | 1.40         |         |         |              |
| 22 28   | 2720.04 | 1.49         | 25 29   | 2682.02 | 1.41         |         |         |              |
| 22 26   | 2720.06 | 1.50         | 25 30   | 2682.10 | 1.49         |         |         |              |
| 23 25   | 2720.09 | 1.53         | 25 36   | 2682.11 | 1.50         |         |         |              |
| 22 30   | 2720.12 | 1.56         | 24 28   | 2682.12 | 1.51         |         |         |              |
| 25 27   | 2720.13 | 1.57         | 25 33   | 2682.14 | 1.52         |         |         |              |
| 23 40   | 2720.16 | 1.60         | 21 30   | 2682.14 | 1.52         |         |         |              |
| 22 35   | 2720.16 | 1.61         | 23 30   | 2682.21 | 1.60         |         |         |              |
| 22 39   | 2720.16 | 1.61         | 25 32   | 2682.24 | 1.63         |         |         |              |
| 24 32   | 2720.16 | 1.61         | 24 29   | 2682.27 | 1.66         |         |         |              |
| 23 30   | 2720.20 | 1.64         | 22 30   | 2682.27 | 1.66         |         |         |              |
| 23 42   | 2720.22 | 1.66         | 25 31   | 2682.30 | 1.69         |         |         |              |
| 24 33   | 2720.30 | 1.74         | 28      | 2682.32 | 1.71         |         |         |              |
| 22 38   | 2720.32 | 1.76         | 24      | 2682.34 | 1.73         |         |         |              |
| 22 36   | 2720.36 | 1.80         | 25 42   | 2682.34 | 1.73         |         |         |              |
| 24 28   | 2720.37 | 1.82         | 19 27   | 2682.36 | 1.75         |         |         |              |
| 22 37   | 2720.37 | 1.82         | 25 37   | 2682.37 | 1.76         |         |         |              |
| 22 25   | 2720.40 | 1.85         | 26 34   | 2682.38 | 1.77         |         |         |              |
| 23 35   | 2720.42 | 1.87         | 26 35   | 2682.40 | 1.79         |         |         |              |
| 23 39   | 2720.49 | 1.93         | 29 43   | 2682.40 | 1.79         |         |         |              |
| 24 29   | 2720.54 | 1.99         | 26 36   | 2682.45 | 1.84         |         |         |              |
| Year+ID | 2734.61 | 16.05        | 25 38   | 2682.47 | 1.86         |         |         |              |
| Age     | 2736.43 | 17.88        | 25 39   | 2682.48 | 1.87         |         |         |              |
| ID      | 3058.22 | 339.66       | 25 40   | 2682.50 | 1.89         |         |         |              |

Wandering albatross

| Males            |         |              | Females |         |              |         |         |              |
|------------------|---------|--------------|---------|---------|--------------|---------|---------|--------------|
| Model            | AIC     | $\Delta$ AIC | Model   | AIC     | $\Delta$ AIC | Model   | AIC     | $\Delta$ AIC |
| 18               | 2841.96 | 0.00         | 18 22   | 2843.64 | 1.68         | 14      | 2837.06 | 0.00         |
| 20               | 2842.04 | 0.07         | 20 23   | 2843.65 | 1.68         | 15      | 2837.69 | 0.64         |
| 12 20            | 2842.16 | 0.20         | 14 22   | 2843.66 | 1.70         | 15 26   | 2838.63 | 1.57         |
| 19               | 2842.18 | 0.21         | 12 25   | 2843.67 | 1.71         | 15 27   | 2838.66 | 1.60         |
| 12 21            | 2842.40 | 0.44         | 12 26   | 2843.69 | 1.72         | 14 27   | 2838.71 | 1.65         |
| 12 22            | 2842.59 | 0.63         | 18 21   | 2843.70 | 1.73         | 14 26   | 2838.73 | 1.67         |
| Age <sup>2</sup> | 2842.86 | 0.89         | 12 23   | 2843.72 | 1.75         | 14 16   | 2838.78 | 1.72         |
| 21               | 2843.06 | 1.10         | 16 20   | 2843.74 | 1.78         | 14 17   | 2838.80 | 1.75         |
| 15 20            | 2843.08 | 1.12         | 13 22   | 2843.76 | 1.80         | 14 28   | 2838.84 | 1.79         |
| 13 20            | 2843.18 | 1.22         | 18 35   | 2843.76 | 1.80         | 14 25   | 2838.91 | 1.85         |
| 15 27            | 2843.20 | 1.23         | 18 24   | 2843.80 | 1.83         | 15 25   | 2838.93 | 1.88         |
| 15 21            | 2843.21 | 1.24         | 19 27   | 2843.80 | 1.84         | 14 18   | 2838.94 | 1.88         |
| 18 27            | 2843.22 | 1.25         | 19 29   | 2843.82 | 1.85         | 15 28   | 2838.96 | 1.91         |
| 15 22            | 2843.22 | 1.26         | 17 20   | 2843.83 | 1.86         | 14 29   | 2838.98 | 1.93         |
| 14 20            | 2843.25 | 1.29         | 19 28   | 2843.84 | 1.88         | 14 19   | 2839.00 | 1.94         |
| 18 29            | 2843.28 | 1.31         | 20 24   | 2843.84 | 1.88         | 14 24   | 2839.02 | 1.97         |
| 18 28            | 2843.28 | 1.32         | 18 23   | 2843.84 | 1.88         | 14 23   | 2839.05 | 1.99         |
| 15 26            | 2843.41 | 1.45         | 17 27   | 2843.87 | 1.91         | 14 20   | 2839.05 | 1.99         |
| 18 26            | 2843.42 | 1.45         | 19 31   | 2843.90 | 1.93         | 14 34   | 2839.05 | 2.00         |
| 18 31            | 2843.42 | 1.46         | 15 23   | 2843.90 | 1.93         | 14 30   | 2839.05 | 2.00         |
| 18 30            | 2843.45 | 1.48         | 20 22   | 2843.91 | 1.95         | 14 31   | 2839.06 | 2.00         |
| 15 28            | 2843.47 | 1.51         | 20 29   | 2843.93 | 1.97         | 14 22   | 2839.06 | 2.00         |
| 17               | 2843.48 | 1.51         | 19 30   | 2843.93 | 1.97         | 14 33   | 2839.06 | 2.00         |
| 18 33            | 2843.50 | 1.54         | 19 33   | 2843.93 | 1.97         | 14 21   | 2839.06 | 2.00         |
| 14 21            | 2843.52 | 1.55         | 21 23   | 2843.94 | 1.98         | 14 35   | 2839.06 | 2.00         |
| 13 21            | 2843.52 | 1.56         | 15 24   | 2843.94 | 1.98         | Year+ID | 2881.80 | 44.74        |
| 15 25            | 2843.55 | 1.58         | 20 27   | 2843.95 | 1.99         | Age     | 2883.26 | 46.20        |
| 18 25            | 2843.56 | 1.60         | 20 31   | 2843.95 | 1.99         | ID      | 2951.97 | 114.91       |
| 18 32            | 2843.59 | 1.62         | 20 28   | 2843.96 | 1.99         |         |         |              |
| 12 27            | 2843.60 | 1.63         | 20 33   | 2843.96 | 1.99         |         |         |              |
| 15 29            | 2843.61 | 1.64         | Year+ID | 2862.23 | 20.27        |         |         |              |
| 18 34            | 2843.63 | 1.66         | Age     | 2862.60 | 20.64        |         |         |              |
| 18 20            | 2843.63 | 1.67         | ID      | 2920.69 | 78.73        |         |         |              |

Table S2. The best single threshold models describing the relationship between age and breeding success, estimated using GLMMs with year and bird ID as random effects. The best threshold is shown in bold, with 95% confidence intervals. The estimates, standard error (S.E.) and significance of the regression slopes before and after the threshold break point are indicated.

|     |         | n    | Threshold |          |          | Before threshold |         |          | After threshold |         |        |
|-----|---------|------|-----------|----------|----------|------------------|---------|----------|-----------------|---------|--------|
|     | age     |      | lower CI  | upper CI | Estimate | S.E.             | p-value | Estimate | S.E.            | p-value |        |
| BBA | Males   | 2273 | <b>18</b> | 16.6     | 21.4     | 0.113            | 0.020   | <0.001   | -0.011          | 0.013   | 0.410  |
|     | Females | 1521 | <b>23</b> | 18.7     | 25.3     | 0.104            | 0.022   | <0.001   | -0.059          | 0.023   | 0.010  |
| GHA | Males   | 2267 | <b>22</b> | 19.5     | 24.4     | 0.093            | 0.023   | <0.001   | -0.049          | 0.013   | <0.001 |
|     | Females | 2225 | <b>26</b> | 23.2     | 28.4     | 0.106            | 0.017   | <0.001   | -0.130          | 0.018   | <0.001 |
| WA  | Males   | 2255 | <b>18</b> | 14.9     | 22.2     | 0.095            | 0.019   | <0.001   | -0.041          | 0.013   | 0.001  |
|     | Females | 2260 | <b>14</b> | 13.5     | 16.2     | 0.210            | 0.031   | <0.001   | -0.040          | 0.009   | <0.001 |

Table S3. Models of breeding success estimated using GLMMs with year, male ID and female ID included as random effects. For each species, the best single threshold age functions for both males and females were included (T1). The effect of removing the male or female age term on the model AIC is shown ( $\Delta$ AIC). The estimates, standard error (S.E.) and significance of the regression slopes before and after the threshold break point are indicated for both the male and female age functions. Statistically significant terms are highlighted in bold.

|     | n    | Male age term |              |                  |              |              |              | Female age term |               |                  |               |              |                  |
|-----|------|---------------|--------------|------------------|--------------|--------------|--------------|-----------------|---------------|------------------|---------------|--------------|------------------|
|     |      | T1            | $\Delta$ AIC | Estimate         | S.E.         | p-value      | T1           | $\Delta$ AIC    | Estimate      | S.E.             | p-value       |              |                  |
| BBA | 944  | <b>18</b>     | <b>7.271</b> | <b>before T1</b> | <b>0.117</b> | <b>0.036</b> | <b>0.001</b> | 23              | -1.638        | before T1        | 0.051         | 0.030        | 0.097            |
|     |      |               |              | after T1         | -0.014       | 0.034        | 0.679        |                 |               | after T1         | -0.047        | 0.040        | 0.242            |
| GHA | 881  | 22            | -2.680       | before T1        | 0.034        | 0.045        | 0.443        | <b>26</b>       | <b>11.394</b> | <b>before T1</b> | <b>0.099</b>  | <b>0.035</b> | <b>0.005</b>     |
|     |      |               |              | after T1         | -0.026       | 0.026        | 0.328        |                 |               | <b>after T1</b>  | <b>-0.145</b> | <b>0.041</b> | <b>&lt;0.001</b> |
| WA  | 1561 | 18            | -3.357       | before T1        | 0.020        | 0.034        | 0.554        | <b>14</b>       | <b>16.597</b> | <b>before T1</b> | <b>0.212</b>  | <b>0.049</b> | <b>&lt;0.001</b> |
|     |      |               |              | after T1         | -0.15        | 0.021        | 0.487        |                 |               | <b>after T1</b>  | <b>-0.043</b> | <b>0.018</b> | <b>0.018</b>     |

Table S4. Estimated fixed effects (estimate (Est.) and standard error (S.E.)) from GLMMs of breeding success for a) males; and b) females during early adulthood. Data for all three species were included in a single model for each sex, and the interaction between species and each of the three age terms tested. Both models included year and bird ID as random effects. Estimates for the main effects are for BBA, and the interaction terms show the effects for GHA and WA relative to BBA. The effect of removing each interaction on the model AIC is shown ( $\Delta$ AIC). Positive  $\Delta$ AIC values indicate that the term improved model fit, and those interactions whose removal increased AIC by >2 are highlighted in bold.

|              |                                      | a) Males n=2823 |              |              | b) Females n=2585 |              |              |
|--------------|--------------------------------------|-----------------|--------------|--------------|-------------------|--------------|--------------|
|              |                                      | Est.            | S.E.         | $\Delta$ AIC | Est.              | S.E.         | $\Delta$ AIC |
| Main effects | Species: GHA                         | 0.736           | 0.971        |              | 1.798             | 1.036        |              |
|              | Species: WA                          | 1.880           | 0.818        |              | 2.505             | 0.837        |              |
|              | Years since first bred               | 0.172           | 0.037        |              | 0.170             | 0.035        |              |
|              | Age at first repro                   | -0.046          | 0.065        |              | 0.097             | 0.052        |              |
|              | First breeding attempt               | -0.042          | 0.269        |              | -0.495            | 0.351        |              |
| Interactions | Years since first bred * Species GHA | <b>-0.126</b>   | <b>0.055</b> | <b>5.769</b> | <b>-0.126</b>     | <b>0.045</b> | <b>4.778</b> |
|              | Years since first bred * Species WA  | <b>-0.148</b>   | <b>0.050</b> |              | <b>-0.040</b>     | <b>0.049</b> |              |
|              | Age at first repro * Species GHA     | 0.019           | 0.083        | -3.228       | -0.102            | 0.077        | -2.188       |
|              | Age at first repro * Species WA      | 0.063           | 0.080        |              | -0.034            | 0.071        |              |
|              | First breeding attempt * Species GHA | -0.326          | 0.397        | 1.613        | -0.217            | 0.462        | -3.210       |
|              | First breeding attempt * Species WA  | -0.774          | 0.334        |              | 0.099             | 0.398        |              |

Table S5. Estimated fixed effects (estimate (Est.) and standard error (S.E.)) from GLMMs of breeding success for a) males; and b) females during late adulthood. Data for all three species were included in a single model for each sex, and the interaction between species and each of the three age terms tested. Both models included year and bird ID as random effects. Estimates for the main effects are for BBA, and the interaction terms show the effects for GHA and WA relative to BBA. The effect of removing each interaction on the model AIC is shown ( $\Delta$ AIC). Positive  $\Delta$ AIC values indicate that the term improved model fit, and those interactions whose removal increased AIC by  $>2$  are highlighted in bold.

|              |                                     | a) Males n=2004 |       |              | b) Females n=1387 |              |              |
|--------------|-------------------------------------|-----------------|-------|--------------|-------------------|--------------|--------------|
|              |                                     | Est.            | S.E.  | $\Delta$ AIC | Est.              | S.E.         | $\Delta$ AIC |
| Main effects | Species: GHA                        | 0.974           | 0.895 |              | -0.773            | 1.721        |              |
|              | Species: WA                         | 0.599           | 0.806 |              | -2.453            | 1.577        |              |
|              | Years before death                  | 0.078           | 0.033 |              | 0.087             | 0.061        |              |
|              | Age at last repro                   | -0.052          | 0.025 |              | -0.144            | 0.050        |              |
|              | Last breeding attempt               | -0.090          | 0.332 |              | 0.069             | 0.539        |              |
| Interactions | Years before death * Species GHA    | 0.014           | 0.037 | -3.834       | <b>0.096</b>      | <b>0.065</b> | <b>4.315</b> |
|              | Years before death * Species WA     | 0.007           | 0.040 |              | <b>-0.013</b>     | <b>0.066</b> |              |
|              | Age at last repro * Species GHA     | -0.016          | 0.030 | -1.593       | <b>0.035</b>      | <b>0.055</b> | <b>4.896</b> |
|              | Age at last repro * Species WA      | 0.021           | 0.029 |              | <b>0.116</b>      | <b>0.053</b> |              |
|              | Last breeding attempt * Species GHA | 0.846           | 0.412 | 0.405        | 0.708             | 0.617        | -2.479       |
|              | Last breeding attempt * Species WA  | 0.667           | 0.404 |              | 0.707             | 0.602        |              |

Table S6. Estimated fixed effects (estimate (Est.) and standard error (S.E.)) from GLMMs of breeding success for birds during late adulthood, accounting for the effects of partner change. All models included year and bird ID as random effects. The effect of removing each parameter on the model AIC is shown ( $\Delta$ AIC). Positive  $\Delta$ AIC values indicate that the term improved model fit, and those parameters whose removal increased AIC by  $>2$  are highlighted in bold.

|     |         | n   | Years before death |              |               | Age at last repro |              |              | Last breeding attempt |              |              | Partner change |       |              |
|-----|---------|-----|--------------------|--------------|---------------|-------------------|--------------|--------------|-----------------------|--------------|--------------|----------------|-------|--------------|
|     |         |     | Est.               | S.E.         | $\Delta$ AIC  | Est.              | S.E.         | $\Delta$ AIC | Est.                  | S.E.         | $\Delta$ AIC | Est.           | S.E.  | $\Delta$ AIC |
| BBA | Males   | 441 | 0.069              | 0.036        | 1.672         | -0.030            | 0.023        | -0.241       | -0.091                | 0.348        | -1.933       | -0.204         | 0.321 | -1.598       |
|     | Females | 172 | 0.030              | 0.028        | -1.828        | -0.109            | 0.063        | 0.940        | -0.060                | 0.618        | -1.990       | -0.894         | 0.690 | -0.150       |
| GHA | Males   | 817 | <b>0.093</b>       | <b>0.028</b> | <b>9.287</b>  | <b>-0.065</b>     | <b>0.024</b> | <b>5.369</b> | <b>0.828</b>          | <b>0.274</b> | <b>7.014</b> | -0.312         | 0.254 | -0.506       |
|     | Females | 570 | <b>0.204</b>       | <b>0.049</b> | <b>17.084</b> | <b>-0.108</b>     | <b>0.042</b> | <b>4.802</b> | <b>0.991</b>          | <b>0.374</b> | <b>5.154</b> | 0.301          | 0.333 | -1.185       |
| WA  | Males   | 711 | <b>0.077</b>       | <b>0.026</b> | <b>7.286</b>  | -0.031            | 0.017        | 1.257        | <b>0.540</b>          | <b>0.235</b> | <b>3.308</b> | -0.137         | 0.354 | -1.850       |
|     | Females | 575 | <b>0.068</b>       | <b>0.026</b> | <b>5.210</b>  | -0.025            | 0.017        | -0.047       | <b>0.695</b>          | <b>0.260</b> | <b>5.272</b> | -0.581         | 0.301 | 1.796        |



Table S7. Estimated fixed effects (estimate (Est.) and standard error (S.E.)) from GLMMs of breeding success for birds during late adulthood, accounting for the number of years since the bird last bred, the outcome of the previous breeding attempt, and the interaction between these terms. All models included year and bird ID as random effects. The effect of removing each parameter on the model AIC is shown ( $\Delta$ AIC). Positive  $\Delta$ AIC values indicate that the term improved model fit, and those parameters whose removal increased AIC by  $>2$  are highlighted in bold.

|     |         | n   | Years before death |              |               | Age at last repro |              |              | Last breeding attempt |              |              |
|-----|---------|-----|--------------------|--------------|---------------|-------------------|--------------|--------------|-----------------------|--------------|--------------|
|     |         |     | Est.               | S.E.         | $\Delta$ AIC  | Est.              | S.E.         | $\Delta$ AIC | Est.                  | S.E.         | $\Delta$ AIC |
| BBA | Males   | 436 | 0.067              | 0.037        | 1.252         | -0.025            | 0.023        | -0.839       | -0.214                | 0.359        | -1.648       |
|     | Females | 169 | 0.007              | 0.073        | -1.992        | -0.088            | 0.064        | -0.230       | -0.238                | 0.638        | -1.859       |
| GHA | Males   | 812 | <b>0.086</b>       | <b>0.028</b> | <b>7.447</b>  | <b>-0.062</b>     | <b>0.024</b> | <b>4.789</b> | <b>0.809</b>          | <b>0.274</b> | <b>6.628</b> |
|     | Females | 570 | <b>0.189</b>       | <b>0.048</b> | <b>14.812</b> | <b>-0.100</b>     | <b>0.041</b> | <b>4.156</b> | <b>1.005</b>          | <b>0.368</b> | <b>5.610</b> |
| WA  | Males   | 594 | <b>0.086</b>       | <b>0.028</b> | <b>7.878</b>  | <b>-0.033</b>     | <b>0.015</b> | <b>2.479</b> | <b>0.564</b>          | <b>0.251</b> | <b>3.071</b> |
|     | Females | 498 | 0.054              | 0.028        | 1.923         | -0.029            | 0.017        | 0.848        | <b>0.754</b>          | <b>0.276</b> | <b>5.607</b> |
